# Supplementary material for: Unique lamellar lyotropic liquid crystal phases of nonionic phytosterol ethoxylates in glycerol
Source: Royal Society of Chemistry journal article supplement (doi:10.1039/c5ra21446g), 2015-01-01
Supplement: c5ra21446g1.pdf [file c5ra21446g1.pdf]

## Supporting Information

### Unique Lamellar Lyotropic Liquid Crystal Phases of Nonionic Phytosterol Ethoxylates in Glycerol

Zhaohong Qian,<sup>a</sup> Xiu Yue,<sup>b</sup> Sijing Yi,<sup>a</sup> Qintang Li,<sup>a</sup> Xiao Chen<sup>a\*</sup>

*a, Key Laboratory of Colloid and Interface Chemistry, Shandong University, Ministry of Education, Jinan, 250100, China*

*b, Laboratory of Environmental Sciences and Technology, Xinjiang Technical Institute of Physics & Chemistry; Key Laboratory of Functional Materials and Devices for Special Environments, Chinese Academy of Sciences, Urumqi, 830011, China*

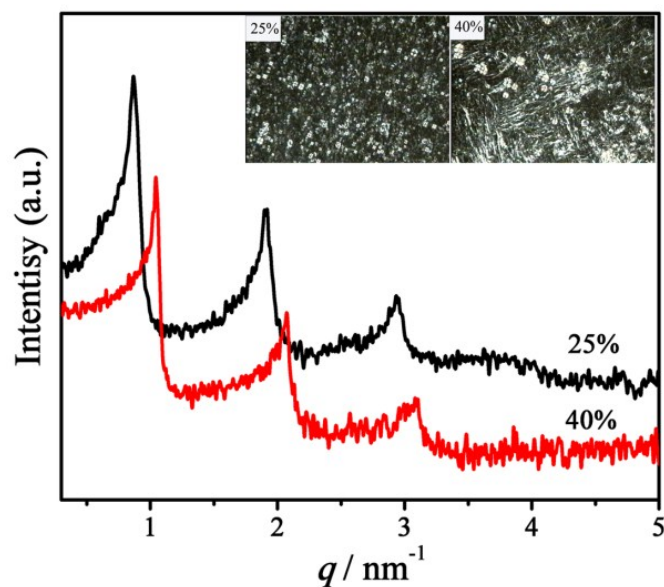

**Figure S1:** Polarized optical micrographs and SAXS patterns from up phase of BPS-5 in glycerol samples at relatively low concentrations and 25 °C.

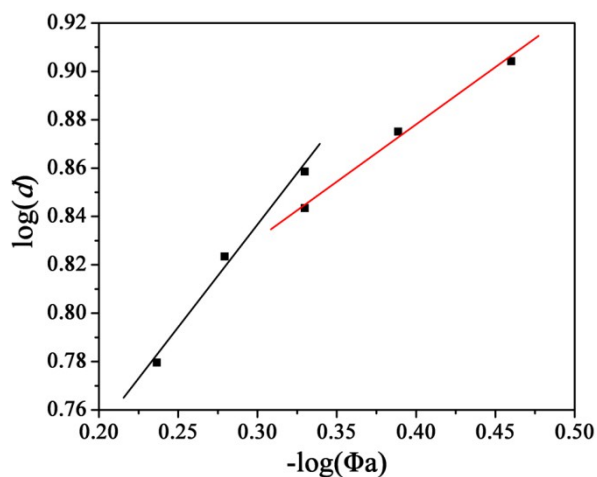

**Figure S2:** Plots of  $\log(d)$  vs  $-\log(\Phi a)$  for the lamellar phase formed in the BPS-5/glycerol binary system.  $d$  is the lamellae repeat distance,  $\Phi a$  is the volume fraction of solvophobic components.

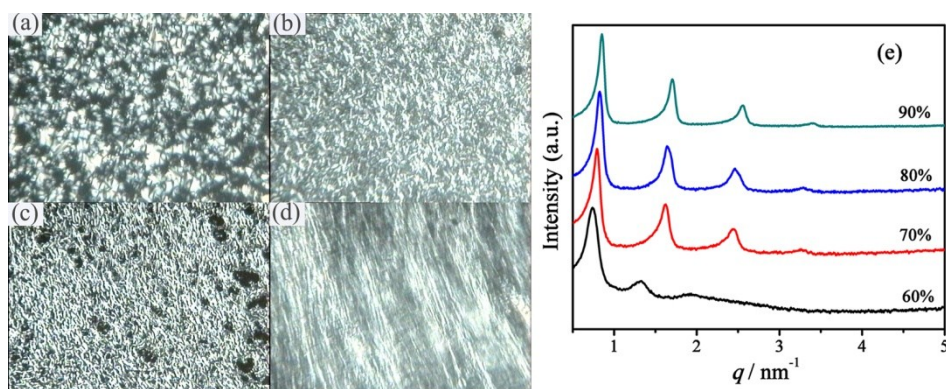

**Figure S3:** (a-d) Polarized optical micrographs and (e) SAXS patterns for BPS-10 in glycerol at different concentrations and 25°C,  $C_{\text{BPS-10}}$  (wt %) = 60, 70, 80, and 90, respectively.

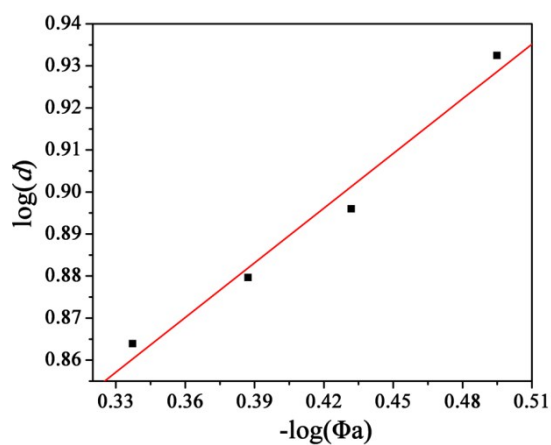

**Figure S4:** Plot of  $\log(d)$  vs  $-\log(\Phi a)$  for the lamellar phase formed in the BPS-10/glycerol binary system.

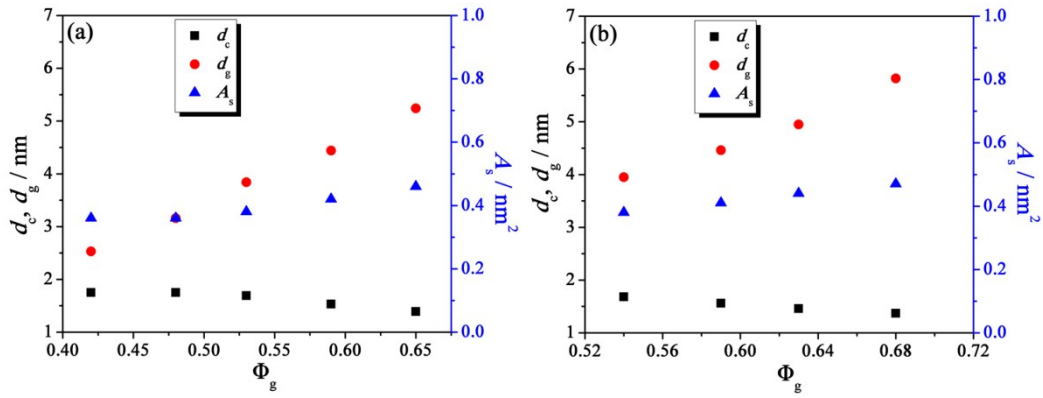

**Figure S5:** Dependence of the solvophobic domain thickness ( $d_c$ ), the solvophilic part thickness ( $d_g$ ), and the effective cross-sectional area per surfactant molecule ( $A_s$ ) on the volume fraction of glycerol ( $\Phi_g$ ) for the formed lamellar phase in BPS-5 (a) and BPS-10 (b) systems.

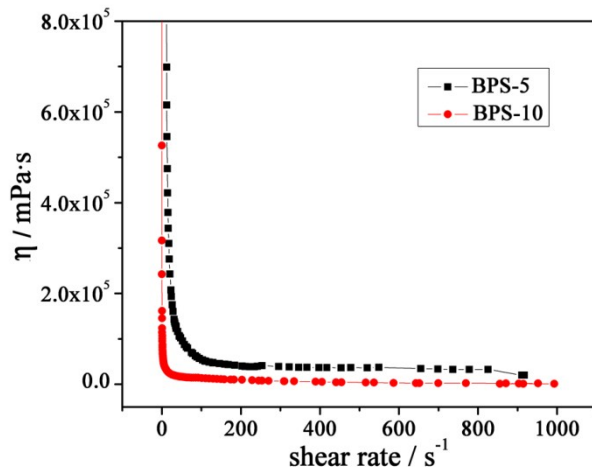

**Figure S6:** Shear rate dependence of the shear viscosities for two samples at  $C_{\text{BPS}} = 90\%$  and  $25^\circ\text{C}$ .

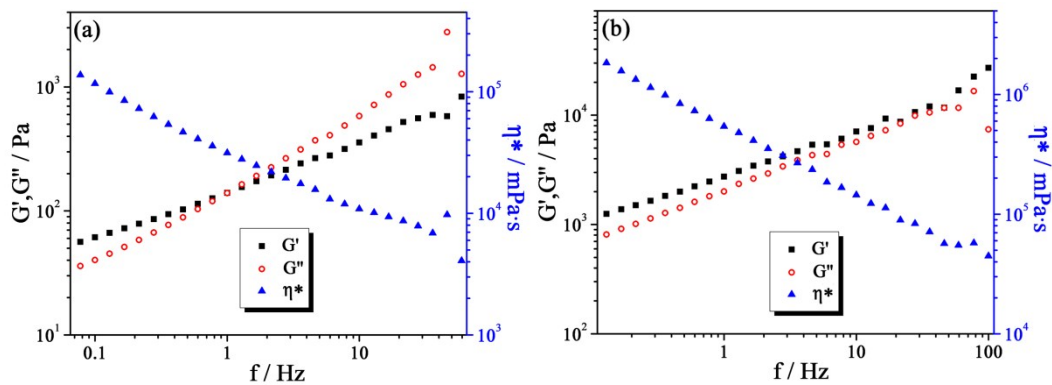

**Figure S7:** Variation of storage and loss moduli and the complex viscosity as a function of shear frequency respectively at different concentrations of BPS-10 in glycerol: (a) 60% and (b) 90%.

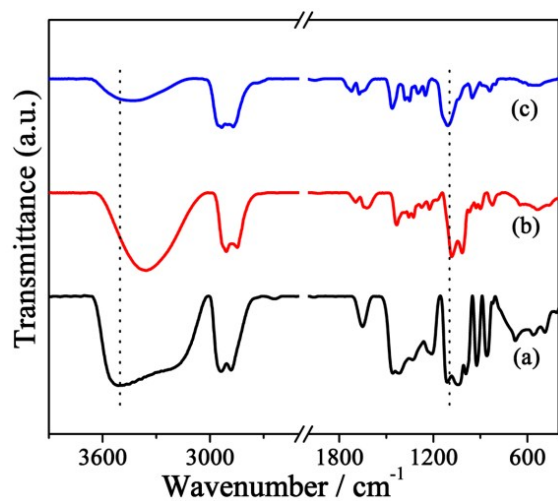

**Figure S8:** FTIR spectra for glycerol (a),  $L\alpha$  phase ( $C_{\text{BPS-10}} = 80\%$ ) (b) and BPS-10 (c), respectively.

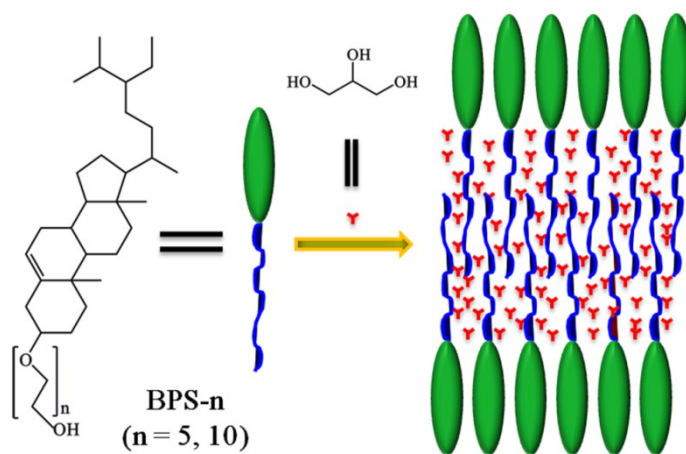

**Figure S9:** The possible packing model for the BPS-n/glycerol binary systems in the lamellar phase.
